# Supplementary material for: Revealing the hydrogen bond network effect at the electrode–electrolyte interface during the hydrogen evolution reaction
Source: Royal Society of Chemistry journal article supplement (doi:10.1039/d4ta08772k), 2025-01-01
Supplement: d4ta08772k1.pdf [file d4ta08772k1.pdf]

## Supporting Information

# Revealing the hydrogen bond network effect at electrode-electrolyte interface during hydrogen evolution reaction

*Chengcheng Zhong<sup>1</sup>, Yuxuan Xiao<sup>1\*</sup>, Jinxian Feng<sup>1</sup>, Chunfa Liu<sup>1</sup>, Lun Li<sup>1</sup>, Weng Fai IP<sup>2</sup>, Shuangpeng Wang<sup>1\*</sup>, Hui Pan<sup>1,2\*</sup>*

<sup>1</sup>Institute of Applied Physics and Materials Engineering, University of Macau, Macao SAR, China

<sup>2</sup>Department of Physics and Chemistry, Faculty of Science and Technology, University of Macau, Macao SAR, China

Corresponding Author

Email address: [yuxuanxiao@um.edu.mo](mailto:yuxuanxiao@um.edu.mo), [spwang@um.edu.mo](mailto:spwang@um.edu.mo), [huipan@um.edu.mo](mailto:huipan@um.edu.mo)

## **Experimental section**

### ***Surface treatment of A100***

The A100 sample was treated in KOH solution with different concentrations (1, 3, 6 and 8 M) by applying cyclic voltammetry at a voltage range of -1.6~0.7 V with a scanning rate of 50mV s<sup>-1</sup> for 200 cycles.

### ***Material characterizations***

The X-ray diffraction (XRD) was performed on the Rigaku Smartlab X-ray diffractometer with Cu K<sub>α</sub> radiation with a scan rate of 2 degrees min<sup>-1</sup>. In-situ Raman measurements were performed on a Micro Raman System (Horiba LABHRev-UV) under the excitation sources of 532 nm. Specifically, an electrochemical workstation (CHI 660E) was connected to the in-situ Raman test setup. Starting from the overpotential of 0 mV, a voltage change gradient of 20 mV was applied, and activation was carried out at the measured voltage for 1 minute before the Raman test. In-situ Fourier transform infrared absorption spectrometer (FTIR) were performed on a Shimadzu IRXross FTIR. Specifically, an electrochemical workstation (CHI 660E) was connected to the in-situ FTIR test setup (external reflection mode). Starting from an overpotential of 0 mV, a voltage change gradient of 20 mV was applied, and activation occurred at the measured voltage for 1 minute before the Raman test. Unlike the in-situ Raman test, the in-situ FTIR test includes a background scan for each measurement. Scanning electron microscopy (SEM) and X-ray energy dispersive spectroscopy (EDS) was performed on a Zeiss Sigma instrument. The chemical composition and state of elements on the surface of the sample were analyzed by X-ray photoelectron spectroscopy (XPS, Thermo Fisher Scientific) with Al K<sub>α</sub> X-ray (hν = 1486.7 eV). Inductively coupled plasma mass spectrometry (ICP-MS) (NexION 1000G ICP-MS) was used to determine the elemental content in the electrolyte after long-term stability test.

### ***Electrochemical measurements:***

Electrochemical measurements were conducted using a three-electrode system with treated or untreated A100 as the working electrode, a Hg/HgO (1 M KOH) as the reference electrode and a graphite rod as the counter electrode on a ModuLabXM electrochemical workstation. The electrocatalytic properties were evaluated in laboratory condition (1 M KOH, room temperature) and industrial condition (6 M KOH, 60 °C). Prior to the performance tests, the samples were pre-activated via CV with the potential range of -1.4~-1.6 V (HER) and 1.6~1.8 V (OER) at a scan rate of 300 mV s<sup>-1</sup> for 500 cycles. The HER and OER performance of catalysts was measured by applying linear sweep voltammetry with a sweep rate of 5 mV cm<sup>-1</sup> in 1 M KOH (room temperature) or 6 M KOH (60 °C). Electrochemical impedance spectroscopy (EIS) measurements

were conducted with a frequency range from  $10^{-2}$  to  $10^5$  Hz in 1 M KOH. Long-term stability assessment was performed in an alkaline flow cell at a current density of  $400 \text{ mA cm}^{-2}$  for 500 hours in 6 M KOH ( $60 \text{ }^\circ\text{C}$ ).

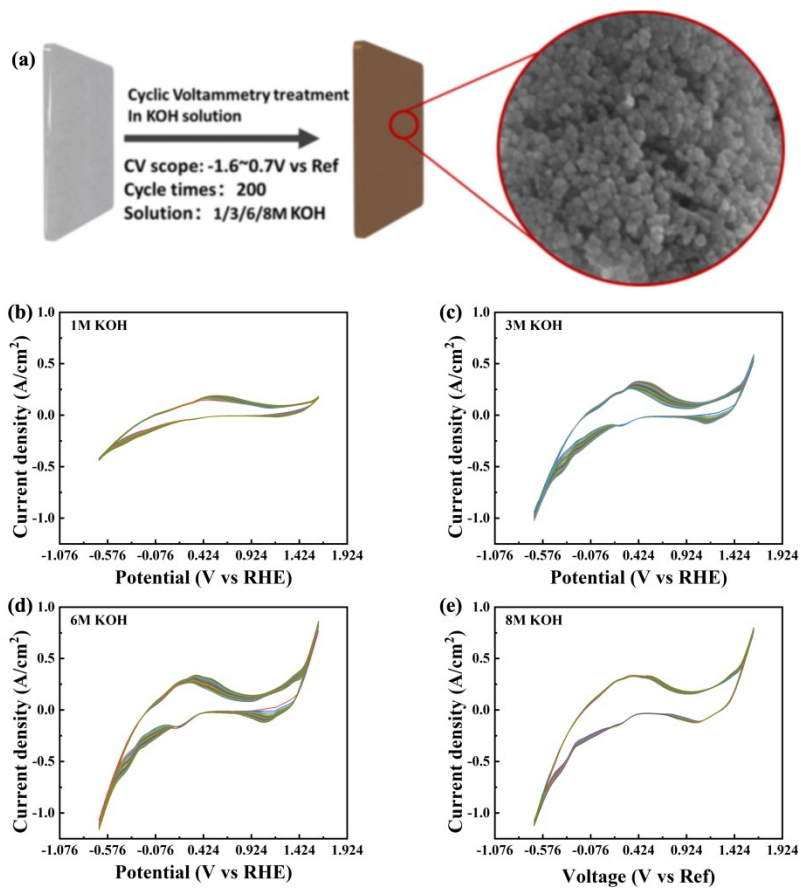

**Fig. S1** (a) Schematic illustration of the treatment process of A100. CV treatment curves of (b) A100-1, (c) A100-3, (d) A100-6, and (e) A100-8, respectively.

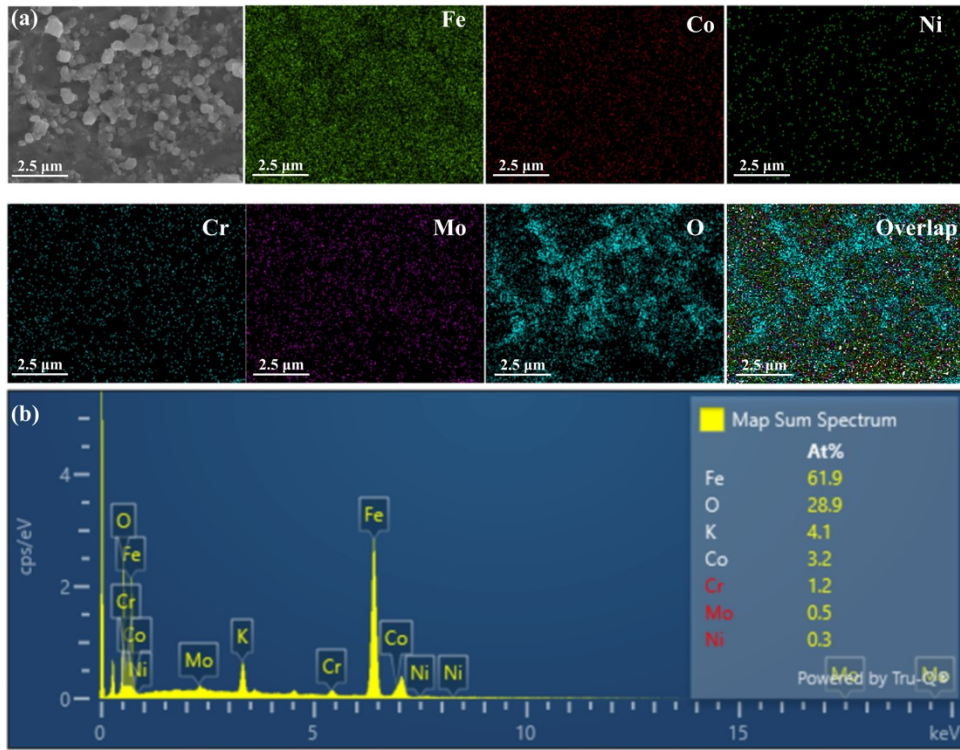

**Fig.S2** (a) SEM image and EDS mapping results, and (b) EDS element atomic ratio of A100-6.

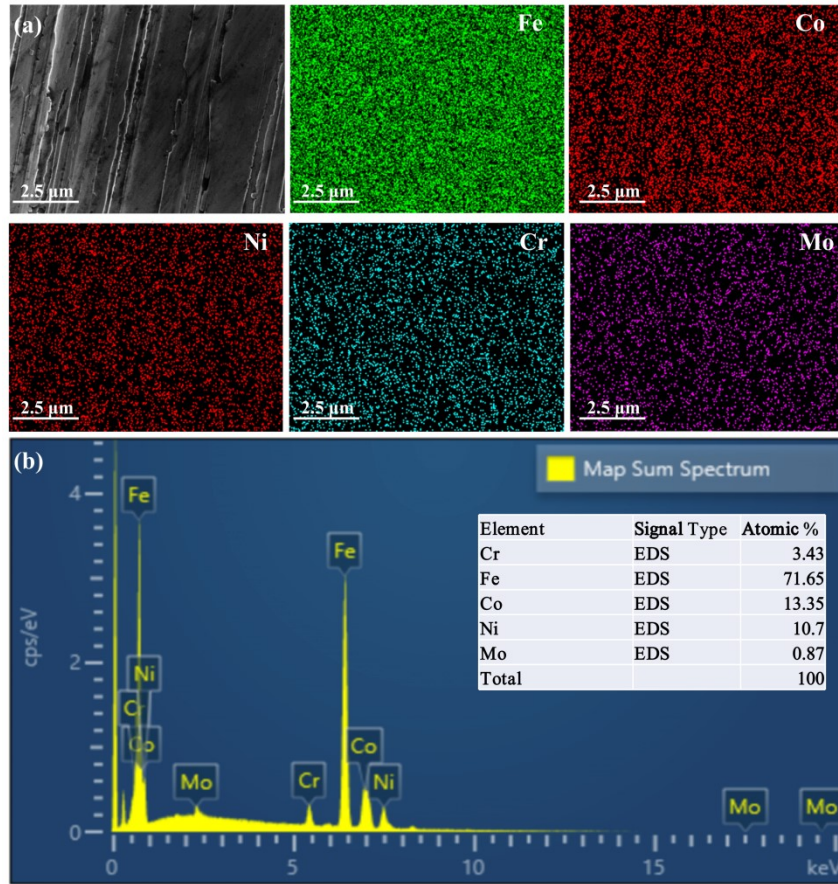

**Fig. S3** (a) SEM image and EDS mapping results, and (b) EDS element atomic ratio of A100.

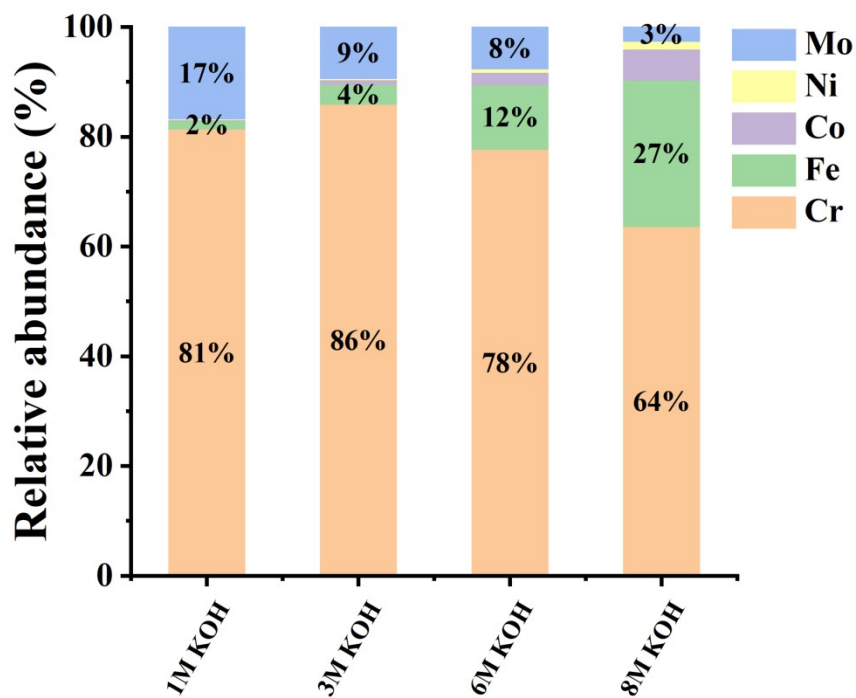

Fig. S4 ICP-MS results of dissolved metal contents in electrolyte after the CV treatment process in KOH with different concentrations.

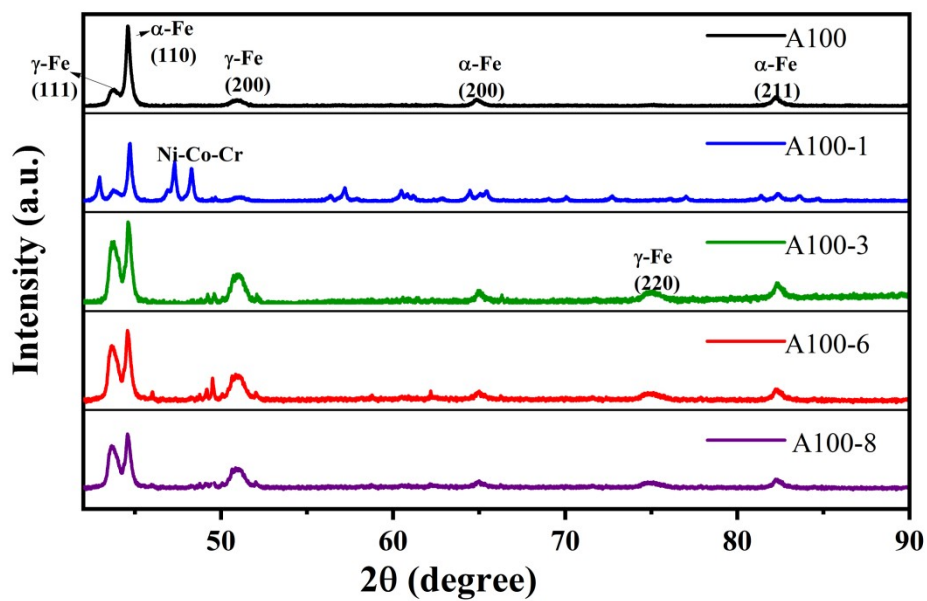

Fig. S5 XRD patterns of A100 and treated A100 samples.

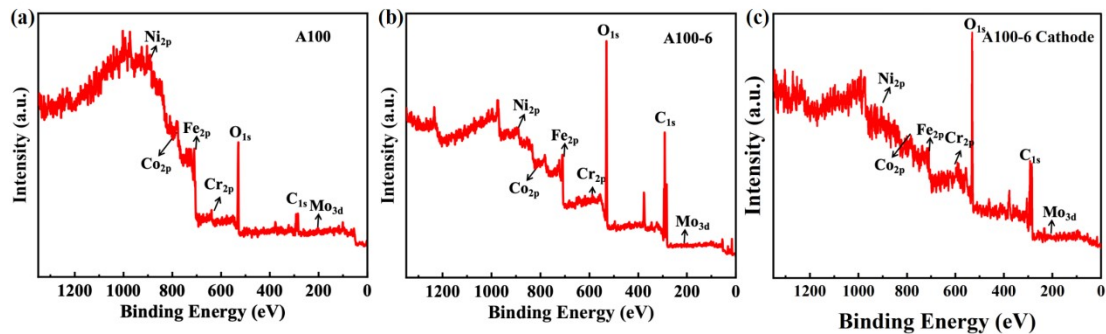

**Fig. S6** The XPS survey spectra of (a) A100, (b) A100-6 and (c) A100-6 after durability test.

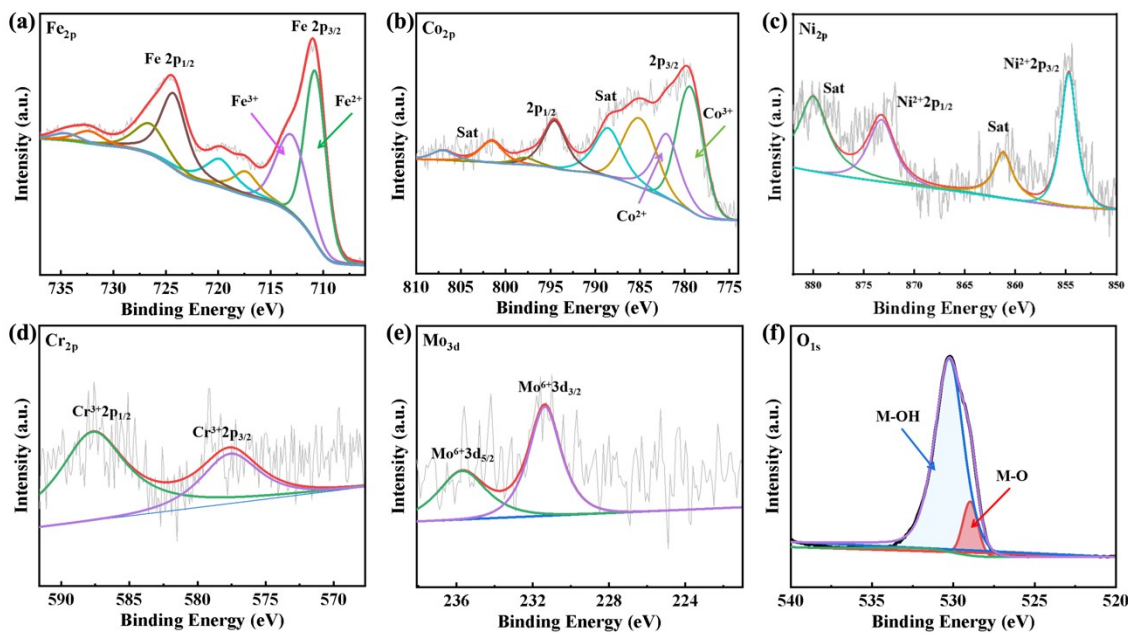

**Fig. S7** The XPS data showing the (a) Fe 2p, (b) Co 2p, (c) Ni 2p, (d) Cr 2p, (e) Mo 3d, and (f) O 1s signals of A100-6.

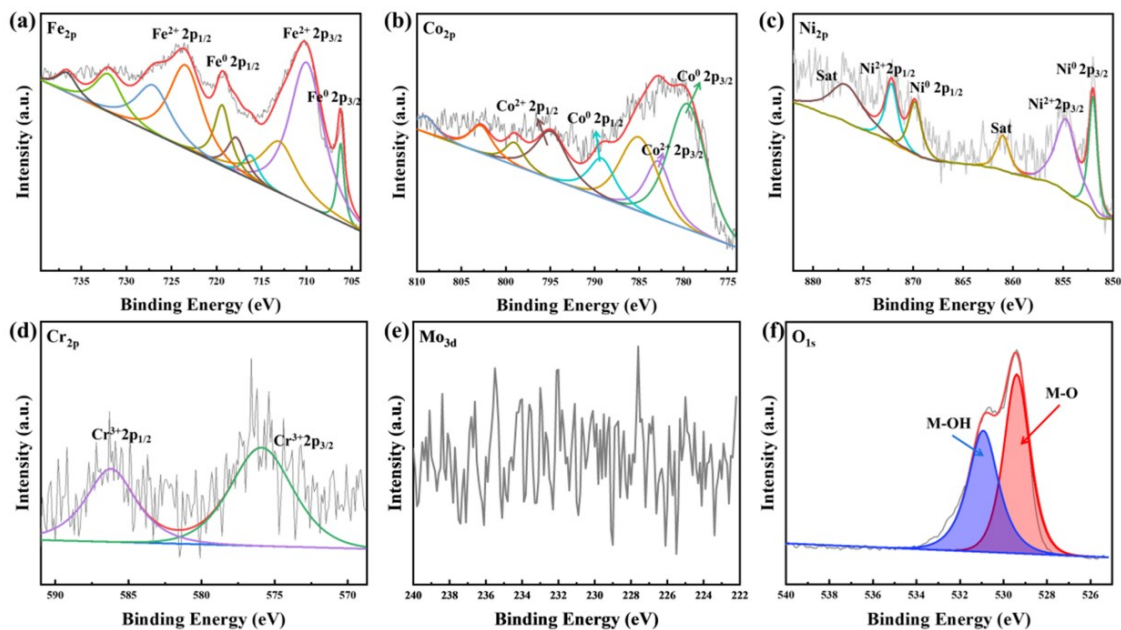

**Fig. S8** The XPS data showing the (a) Fe 2p, (b) Co 2p, (c) Ni 2p, (d) Cr 2p, (e) Mo 3d, and (f) O 1s signals of A100.

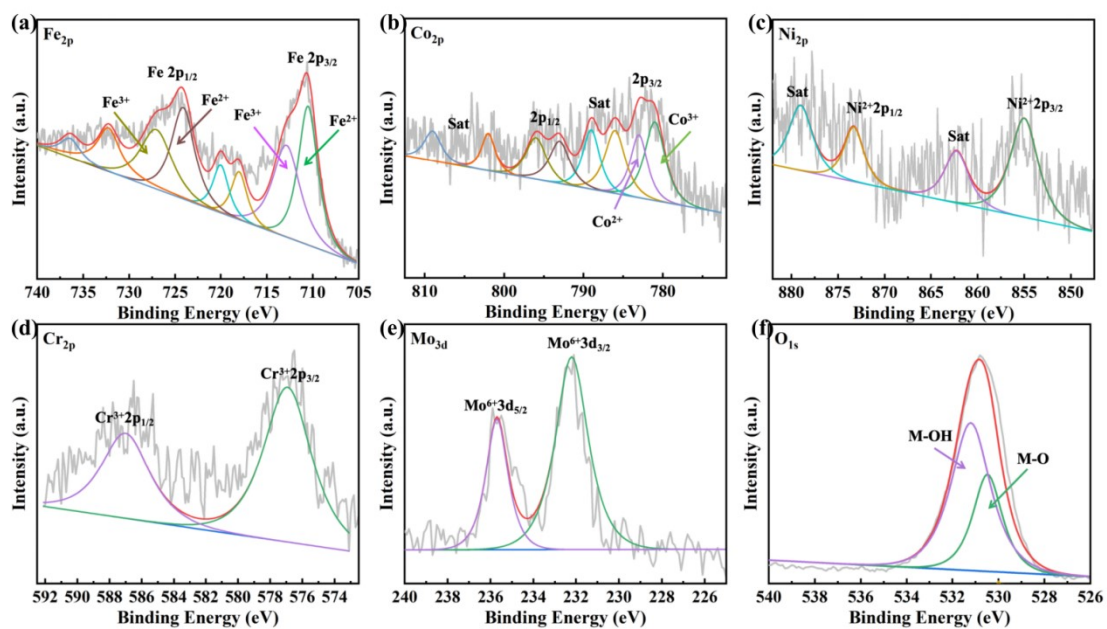

**Fig. S9** The XPS data showing the (a) Fe 2p, (b) Co 2p, (c) Ni 2p, (d) Cr 2p, (e) Mo 3d, and (f) O 1s signals of A100-6 after the stability test.



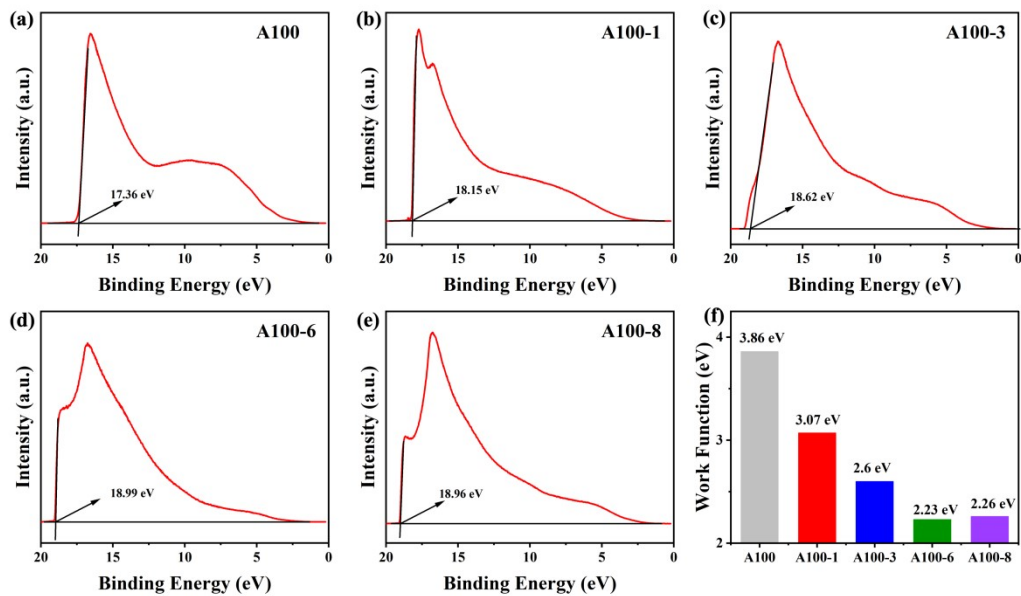

**Fig.S10** UPS spectra of (a) A100, (b) A100-1, (c) A100-3, (d) A100-6 and (e) A100-8. (f) Comparison of WF values of treated and untreated A100 samples.

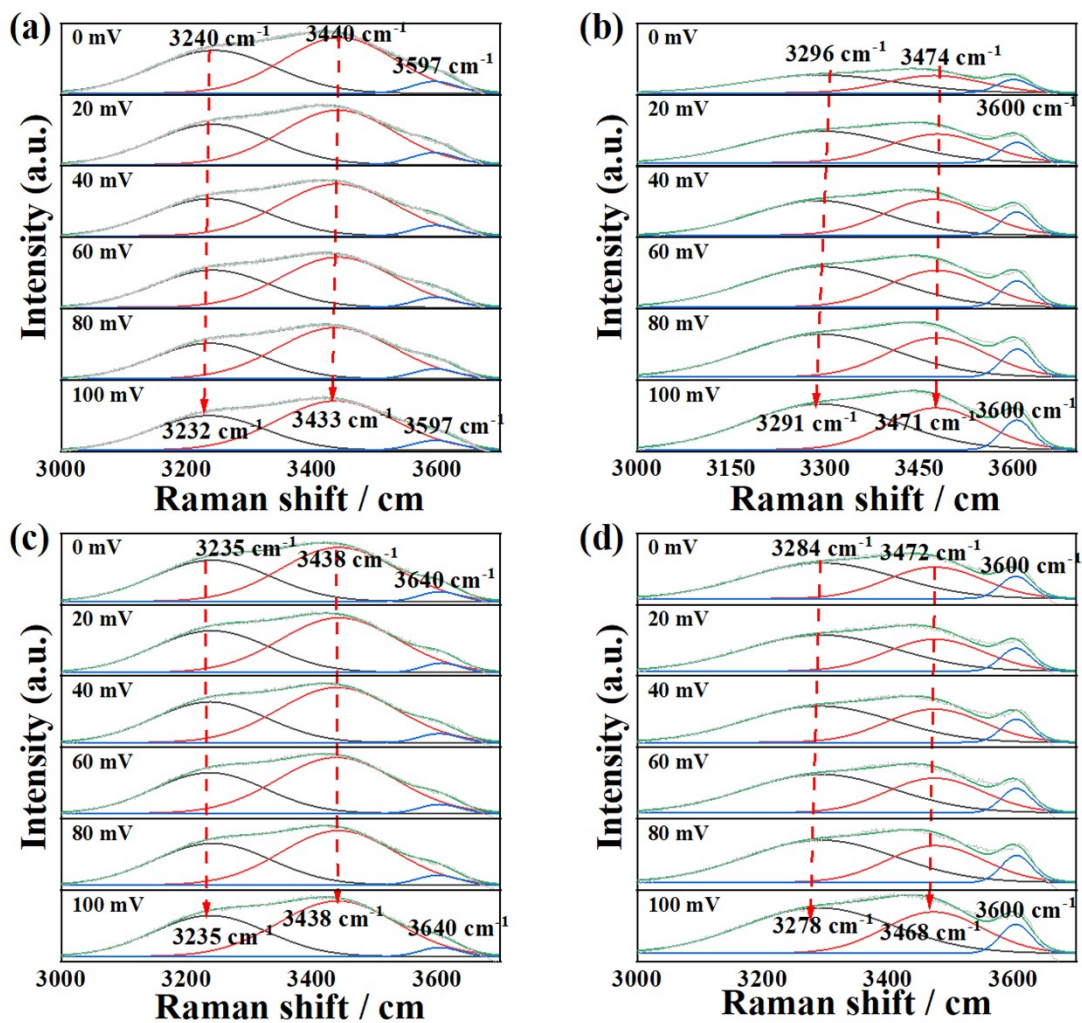

**Fig. S11** Gaussian peak fitting results of the Raman peaks of water during the HER process for A100-6 in (a) 1 M KOH and (b) 6 M KOH and A100 in (c) 1 M KOH and (d) 6 M KOH.

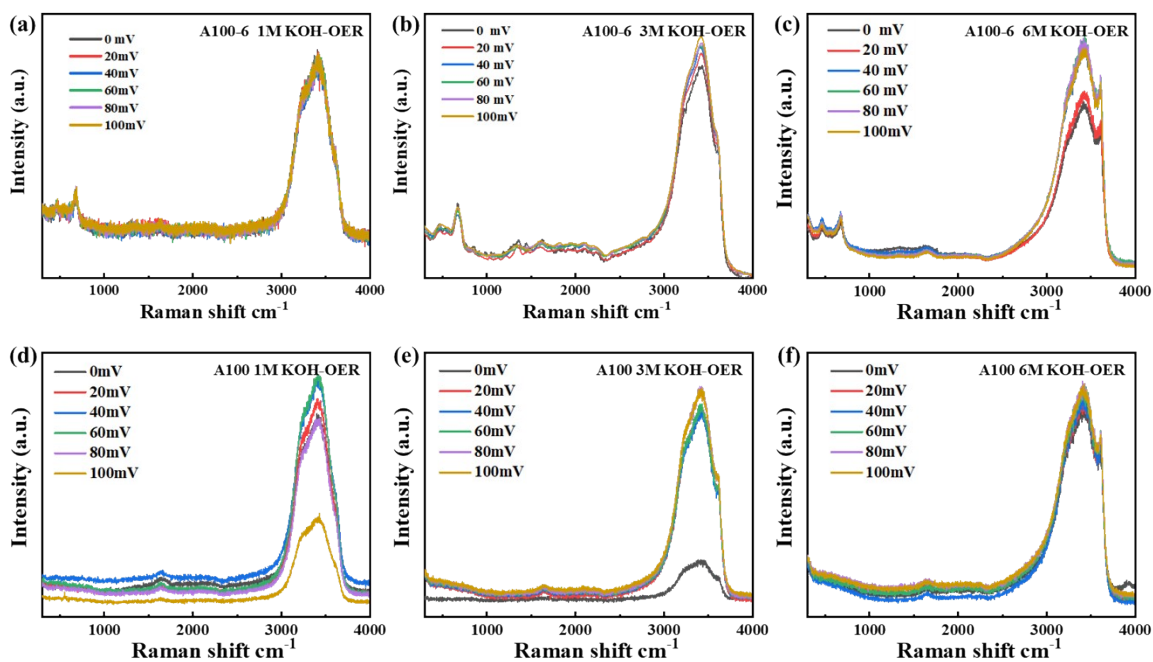

**Fig.S12** In-situ Raman spectra (OER process) of A100-6 in (a) 1 M KOH, (b) 3 M KOH and (c) 6 M KOH solution. In-situ Raman spectra (OER process) of A100 in (d) 1 M KOH, (e) 3 M KOH and (f) 6 M KOH solution at different overpotentials.

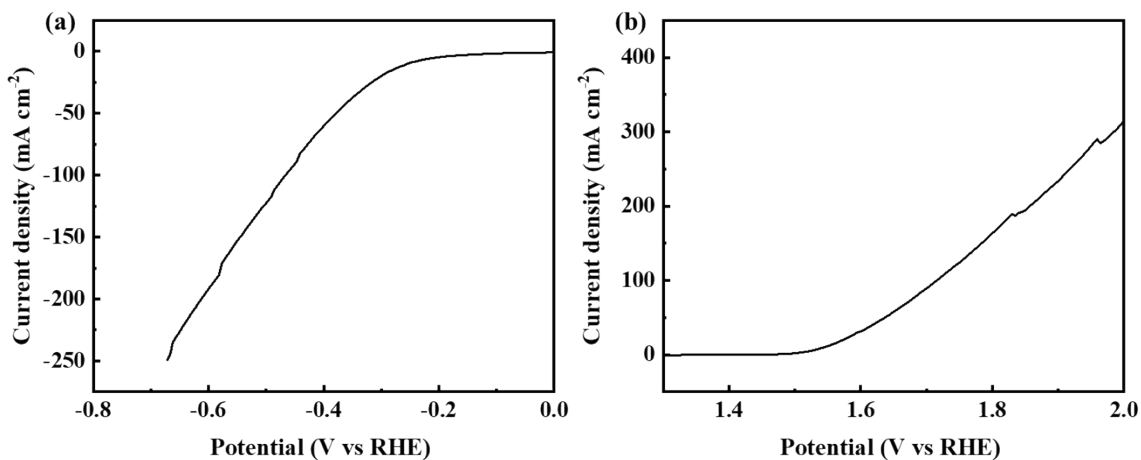

**Fig.S13** (a) HER and (b) OER polarization curves of industrial nickel net in laboratory condition (1 M KOH and ambient temperature).
